# Supplementary material
Source: PubMed Central journal article supplement (PMC2685440)
Supplement: neo1106_0509SD1.pdf [file neo1106_0509SD1.pdf]

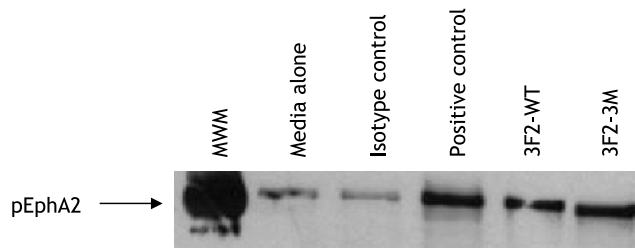

**Figure W1.** 3F2-WT and 3F2-3M activate EphA2 *in vitro*. EphA2 agonist activity of 3F2-WT, 3F2-3M, and control antibodies was determined by evaluating EphA2 phosphorylation in HeyA8 human ovarian carcinoma cells at 10  $\mu\text{g/ml}$  as described in Materials and Methods.

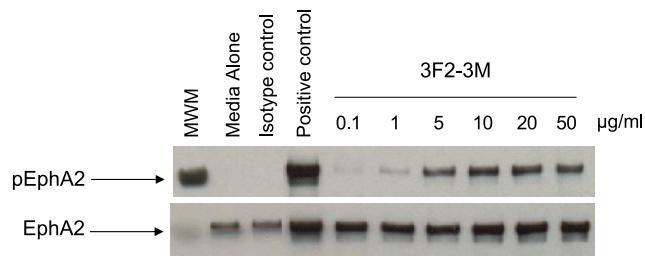

**Figure W2.** 3F2-3M activates EphA2 *in vitro*. EphA2 agonist activity of 3F2-3M was determined by evaluating EphA2 phosphorylation in HeyA8 ovarian carcinoma cells at concentrations from 0.1 to 50  $\mu\text{g/ml}$  as described in Materials and Methods. Control antibodies were evaluated at 10  $\mu\text{g/ml}$ .

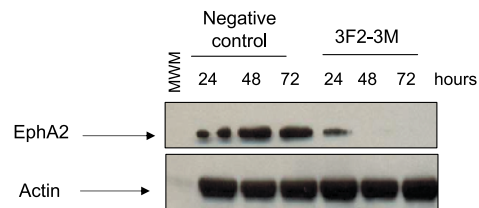

**Figure W3.** 3F2-3M induces degradation of EphA2 *in vitro*. Degradation of EphA2 was determined by treating MDA-MB-231 cells with 10  $\mu\text{g/ml}$  of 3F2-3M antibody for 24 to 72 hours. Lysates were collected as described for EphA2 activation assays. Equal proteins were resolved by SDS-PAGE, transferred to polyvinylidene fluoride membrane, and immunoblotted with anti-EphA2 (Invitrogen) or anti- $\beta$ -actin antibodies (Sigma).

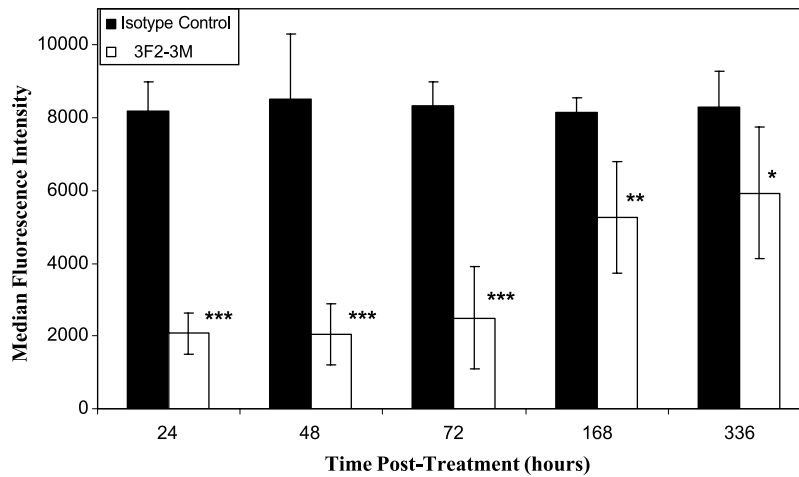

**Figure W4.** 3F2-3M treatment induces degradation of cell surface EphA2 *in vivo*. MDA-MB-231 breast carcinoma cells ( $2 \times 10^6$ ) were implanted proximal to the mammary fat pad of female nude mice. Once tumors reached approximately  $150 \text{ mm}^3$ , mice were given a single intraperitoneal injection of either 3F2-3M or isotype control at 10 mg/kg. Tumors were then harvested at 24, 48, 72, 168, and 336 hours after 3F2-3M administration. Tumors were dissociated with collagenase into a single-cell suspension, stained, and analyzed by FACS using an EphA2 antibody that does not compete with 3F2-3M. Two-way analysis of variance revealed that at 24, 48, 72, 168, and 336 hours, EphA2 levels at the cells surface of tumor cells treated with 3F2-3M are statistically lower than those treated with the isotype control antibody: \* $P < .05$ , \*\* $P < .001$  to  $.01$ , \*\*\* $P < .001$ .

**Table W1.** Summary of 3F2-3M ADCC Activity in a Panel of Human Cancer Cell Lines.

| Cell Line  | Tumor Type           | EphA2 Expression through FACS Fold Log Change over Secondary | Percent Cytotoxicity (E/T, 50:1; 500 ng/ml) |
|------------|----------------------|--------------------------------------------------------------|---------------------------------------------|
| A549       | NSCLC                | 3                                                            | ~65%                                        |
| T231       | Breast               | 3                                                            | ~36%                                        |
| MDA-MB-231 | Breast               | 2                                                            | ~20% (E/T = 30:1)                           |
| A498       | Renal cell carcinoma | 1                                                            | ~45%                                        |
| HeyA8      | Ovarian              | 3                                                            | ~40%                                        |
| SKOV3      | Ovarian              | 2                                                            | ~20%                                        |
| M21        | Melanoma             | 0                                                            | <10%                                        |
| SKMel28    | Melanoma             | 0                                                            | <10%                                        |
